# Supplementary material for: Diversity and pathogenicity of Alternaria species associated with the invasive plant Ageratina adenophora and local plants
Source: PeerJ. 2022 Feb 28;10:e13012. doi: 10.7717/peerj.13012 (PMC8893028; doi:10.7717/peerj.13012)
Supplement: Supplemental Information 7 — Fungal isolation information, reference sequences downloaded from Genbank for phylogenetic tree construction, morphological description and pathogenicity measurements. [file peerj-10-13012-s007.xlsx]

## Sheet: Isolate information
Sequence_ID	Collection_date	Host	Lat_Lon	Locality	Chinese province
A100	Aug-2016	Camellia sinensis	23.56 N 102.00 E	Yuanjiang	Yunnan
A22	Aug-2016	Euphorbia milii	24.12 N 102.29 E	Eshan	Yunnan
A23	Aug-2016	Euphorbia milii	24.12 N 102.29 E	Eshan	Yunnan
A34	Aug-2016	Zehneria maysorensis	24.46 N 100.21 E	Jianchuan	Yunnan
A349	Aug-2016	Dioscorea subcalva	24.46 N 100.21 E	Jianchuan	Yunnan
A352	Aug-2016	Dioscorea subcalva	24.46 N 100.21 E	Jianchuan	Yunnan
A355	Aug-2016	Dioscorea subcalva	24.46 N 100.21 E	Jianchuan	Yunnan
A360	Aug-2016	Cynanchum otophyllum	24.46 N 100.21 E	Jianchuan	Yunnan
A37	Aug-2016	Zehneria maysorensis	24.12 N 102.29 E	Eshan	Yunnan
A390	Aug-2016	Cyclobalanopsis glaucoides	24.46 N 100.21 E	Jianchuan	Yunnan
A494	Aug-2016	Nicotiana tabacum	23.34 N 99.34 E	Cangyuan	Yunnan
A524	Aug-2016	Betula alnoides	23.34 N 99.34 E	Cangyuan	Yunnan
A584	Aug-2016	Nicotiana tabacum	27.42 N 104.86 E	Zhenxiong	Yunnan
A604	Aug-2016	Cynanchum otophyllum	27.42 N 104.86 E	Zhenxiong	Yunnan
A605	Aug-2016	Cynanchum otophyllum	27.42 N 104.86 E	Zhenxiong	Yunnan
A673	Aug-2016	Amygdalus persica	27.42 N 104.86 E	Zhenxiong	Yunnan
A699	Aug-2016	Gonostegia hirta	27.42 N 104.86 E	Zhenxiong	Yunnan
A824	Aug-2016	Betula alnoides	27.61 N 104.06 E	Yiliang	Yunnan
A883	Aug-2016	Betula alnoides	24.66 N 100.23 E	Yunxian	Yunnan
A94	Aug-2016	Camellia sinensis	23.56 N 102.00 E	Yuanjiang	Yunnan
DB94	Aug-2018	Betula alnoides	23.34 N 106.57 E	Debao	Guangxi
DX101	Aug-2018	Capsicum annuum	25.84N 107.06 E	Pingtang	Guizhou
DX103	Aug-2018	Capsicum annuum	25.84N 107.06 E	Pingtang	Guizhou
DX16	Aug-2018	Capsicum annuum	26.83 N 105.58 E	Nayong	Guizhou
DX187	Aug-2018	Phaseolus vulgaris	25.84N 107.06 E	Pingtang	Guizhou
DX19	Aug-2018	Capsicum annuum	26.83 N 105.58 E	Nayong	Guizhou
DX209	Aug-2018	Amygdalus persica	30.45 N 106.02 E	Nanchong	Sichuan
DX23	Aug-2018	Amygdalus persica	26.83 N 105.58 E	Nayong	Guizhou
DX237	Aug-2018	Amygdalus persica	30.45 N 106.02 E	Nanchong	Sichuan
DX239	Aug-2018	Amygdalus persica	30.45 N 106.02 E	Nanchong	Sichuan
DX240	Aug-2018	Amygdalus persica	30.45 N 106.02 E	Nanchong	Sichuan
DX250	Aug-2018	Amygdalus persica	30.45 N 106.02 E	Nanchong	Sichuan
DX256	Aug-2018	Amygdalus persica	30.45 N 106.02 E	Nanchong	Sichuan
DX272	Aug-2018	Amygdalus persica	30.45 N 106.02 E	Nanchong	Sichuan
DX280	Aug-2018	Amygdalus persica	30.45 N 106.02 E	Nanchong	Sichuan
DX290	Aug-2018	Brassica rapa	30.77 N 111.32 E	Yichang	Hubei
DX291	Aug-2018	Brassica rapa	30.77 N 111.32 E	Yichang	Hubei
DX293	Aug-2018	Brassica rapa	30.77 N 111.32 E	Yichang	Hubei
DX295	Aug-2018	Brassica rapa	30.77 N 111.32 E	Yichang	Hubei
DX296	Aug-2018	Brassica rapa	30.77 N 111.32 E	Yichang	Hubei
DX297	Aug-2018	Brassica rapa	30.77 N 111.32 E	Yichang	Hubei
DX298	Aug-2018	Brassica rapa	30.77 N 111.32 E	Yichang	Hubei
DX299	Aug-2018	Brassica rapa	30.77 N 111.32 E	Yichang	Hubei
DX300	Aug-2018	Brassica rapa	30.77 N 111.32 E	Yichang	Hubei
DX302	Aug-2018	Brassica rapa	30.77 N 111.32 E	Yichang	Hubei
DX307	Aug-2018	Lactuca sativa	30.77 N 111.32 E	Yichang	Hubei
DX308	Aug-2018	Lactuca sativa	30.77 N 111.32 E	Yichang	Hubei
DX309	Aug-2018	Lactuca sativa	30.77 N 111.32 E	Yichang	Hubei
DX310	Aug-2018	Lactuca sativa	30.77 N 111.32 E	Yichang	Hubei
DX311	Aug-2018	Lactuca sativa	30.77 N 111.32 E	Yichang	Hubei
DX312	Aug-2018	Lactuca sativa	30.77 N 111.32 E	Yichang	Hubei
DX313	Aug-2018	Lactuca sativa	30.77 N 111.32 E	Yichang	Hubei
DX40	Aug-2018	Capsicum annuum	25.84N 107.06 E	Pingtang	Guizhou
DX42	Aug-2018	Capsicum annuum	25.84N 107.06 E	Pingtang	Guizhou
DX43	Aug-2018	Capsicum annuum	25.84N 107.06 E	Pingtang	Guizhou
DX5	Aug-2018	Phaseolus vulgaris	26.83 N 105.58 E	Nayong	Guizhou
DX54	Aug-2018	Nicotiana tabacum	25.84N 107.06 E	Pingtang	Guizhou
DX71	Aug-2018	Phaseolus vulgaris	25.84N 107.06 E	Pingtang	Guizhou
DX79	Aug-2018	Capsicum annuum	25.84N 107.06 E	Pingtang	Guizhou
DX83	Aug-2018	Nicotiana tabacum	25.84N 107.06 E	Pingtang	Guizhou
DX84	Aug-2018	Nicotiana tabacum	25.84N 107.06 E	Pingtang	Guizhou
DX93	Aug-2018	Solanum melongena	25.84N 107.06 E	Pingtang	Guizhou
DX95	Aug-2018	Solanum melongena	25.84N 107.06 E	Pingtang	Guizhou
DY41	Aug-2018	Gonostegia hirta	26.25 N 107.51 E	Duyun	Guizhou
G128	Aug-2017	Ageratina adenophora	24.85 N 102.63 E	Kunming	Yunnan
G148	Aug-2017	Ageratina adenophora	24.85 N 102.63 E	Kunming	Yunnan
G149	Aug-2017	Ageratina adenophora	24.85 N 102.63 E	Kunming	Yunnan
G1780	Aug-2017	Ageratina adenophora	22.75 N 100.81 E	Puer	Yunnan
G199	Aug-2017	Ageratina adenophora	24.85 N 102.63 E	Kunming	Yunnan
G43	Aug-2017	Ageratina adenophora	24.85 N 102.63 E	Kunming	Yunnan
G456	Aug-2017	Ageratina adenophora	25.13 N 100.35 E	Weishan	Yunnan
G526	Aug-2017	Ageratina adenophora	25.13 N 100.35 E	Weishan	Yunnan
G530	Aug-2017	Ageratina adenophora	25.13 N 100.35 E	Weishan	Yunnan
G531	Aug-2017	Ageratina adenophora	25.13 N 100.35 E	Weishan	Yunnan
G54	Aug-2017	Ageratina adenophora	24.85 N 102.63 E	Kunming	Yunnan
G554	Aug-2017	Ageratina adenophora	25.13 N 100.35 E	Weishan	Yunnan
G574	Aug-2017	Ageratina adenophora	25.13 N 100.35 E	Weishan	Yunnan
G717	Aug-2017	Ageratina adenophora	22.76 N 99.71 E	Lancang	Yunnan
K273	Aug-2015	Ageratina adenophora	24.85 N 102.63 E	Kunming	Yunnan
W113	Aug-2015	Ageratina adenophora	24.12 N 102.29 E	Eshan	Yunnan
W201	Aug-2015	Ageratina adenophora	25.37 N 100.49 E	Midu	Yunnan
W210	Aug-2015	Phaseolus vulgaris	24.12 N 102.29 E	Eshan	Yunnan
W22	Aug-2015	Ageratina adenophora	25.37 N 100.49 E	Midu	Yunnan
W231	Aug-2015	Alnus nepalensis	24.12 N 102.29 E	Eshan	Yunnan
W243	Aug-2015	Ageratina adenophora	25.37 N 100.49 E	Midu	Yunnan
W277	Aug-2015	Imperata cylindrica	24.12 N 102.29 E	Eshan	Yunnan
W283	Aug-2015	Capsicum annuum	25.37 N 100.49 E	Midu	Yunnan
W344	Aug-2015	Phaseolus vulgaris	24.12 N 102.29 E	Eshan	Yunnan
W349	Aug-2015	Phaseolus vulgaris	25.37 N 100.49 E	Midu	Yunnan
W382	Aug-2015	Ageratina adenophora	25.37 N 100.49 E	Midu	Yunnan
W385	Aug-2015	Phaseolus vulgaris	25.37 N 100.49 E	Midu	Yunnan
W386	Aug-2015	Ageratina adenophora	25.37 N 100.49 E	Midu	Yunnan
W412	Aug-2015	Ageratina adenophora	24.12 N 102.29 E	Eshan	Yunnan
W418	Aug-2015	Musa nana	25.37 N 100.49 E	Midu	Yunnan
W419	Aug-2015	Ageratina adenophora	24.12 N 102.29 E	Eshan	Yunnan
W659	Aug-2015	Ageratina adenophora	25.37 N 100.49 E	Midu	Yunnan
W730	Aug-2015	Ageratina adenophora	25.37 N 100.49 E	Midu	Yunnan
W731	Aug-2015	Ageratina adenophora	25.37 N 100.49 E	Midu	Yunnan
W762	Aug-2015	Ageratina adenophora	25.37 N 100.49 E	Midu	Yunnan
W881	Aug-2015	Ageratina adenophora	25.37 N 100.49 E	Midu	Yunnan
X182	Aug-2015	Ageratina adenophora	24.85 N 102.63 E	Kunming	Yunnan
Y187	Aug-2015	Ageratina adenophora	24.85 N 102.63 E	Kunming	Yunnan
Y60	Aug-2015	Ageratina adenophora	24.85 N 102.63 E	Kunming	Yunnan
Y61	Aug-2015	Ageratina adenophora	24.85 N 102.63 E	Kunming	Yunnan

## Sheet: Reference sequence
Species	Alt a 1	calmodulin	Source	Locality, host
Alternaria alternata	KP123882.1	MH168346.1	CBS 102603	Israel, Minneola tangelo
	KP123847.1	MH168350.1	CBS 106.24	USA, Malus sylvestris
	KP123853.1	JQ646197.1	CBS 106.34	Unknown, Linum usitatissimum
	KP123904.1	MH107302.1	CBS 118811	USA, Brassica oleracea
	KP123905.1	MH175184.1	CBS 118812	USA, Daucus carota
	KP123911.1	MH107304.1	CBS 119543	USA, Citrus paradisi
	JQ646402.1	MH175186.1	CBS 121454	USA, Cuscuta gronovii
	KP123917.1	MH168352.1	CBS 121456	China, Sanguisorba officinalis
	KP123929.1	MH137286.1	CBS 127671	USA, Stanleya pinnata
	KP123869.1	MH168351.1	CBS 194.86	USA, Quercus sp.
	JQ646399.1	JQ646204.1	CBS 595.93	Japan, Pyrus pyrifolia
Alternaria gossypina	JQ646395.1	JQ646202.1	CBS104.32	Zimbabwe, Gossypium sp.
	KP123977.1	JQ646201.1	CBS100.23	Unknown, Malus domestica
Alternaria steviae	JQ646423.1	JQ646240.1	CBS632.88	Japan, Stevia rebaudiana
Alternaria consortialis	FJ266509.1	JQ646173.1	CBS201.67

## Sheet: Morphological data
	spore morphology					Colony morphology-PDA			Colony morphology-PCA
	shape	color	transverse septa	longitudinal septa	beak	shape	pigment	Average diameter of 7 days at 28℃（cm）	shape	pigment	Average diameter of 7 days at 28℃（cm）	identification
A100	rod-shaped, ovoid or nearly elliptical	brown to black	3—6	0—3	beakless or pseudo rostrate	round and fluffy	nothing	7.64	round and fluffy	nothing	6.8	Alternaria alternata(group1)
A37	rod-shaped, ovoid or nearly elliptical	brown to black	3—6	0—3	beakless or pseudo rostrate	round and fluffy	nothing	7.67	round and fluffy	nothing	6.6
A699	rod-shaped, ovoid or nearly elliptical	brown to black	3—6	0—3	beakless or pseudo rostrate	round and fluffy	nothing	8.75	round and fluffy	nothing	7.2
DX23	rod-shaped, ovoid or nearly elliptical	brown to black	3—6	0—3	beakless or pseudo rostrate	round and fluffy	nothing	7.4	round and fluffy	nothing	5.3
DX291	rod-shaped, ovoid or nearly elliptical	brown to black	3—6	0—3	beakless or pseudo rostrate	round and fluffy	nothing	7.37	round and fluffy	nothing	7.2
DX298	rod-shaped, ovoid or nearly elliptical	brown to black	3—6	0—3	beakless or pseudo rostrate	round and fluffy	nothing	8.42	round and fluffy	nothing	7.93
DX299	rod-shaped, ovoid or nearly elliptical	brown to black	3—6	0—3	beakless or pseudo rostrate	round and fluffy	nothing	8.73	round and fluffy	nothing	6.8
DX300	rod-shaped, ovoid or nearly elliptical	brown to black	3—6	0—3	beakless or pseudo rostrate	round and fluffy	nothing	6.67	round and fluffy	nothing	6.2
DX313	rod-shaped, ovoid or nearly elliptical	brown to black	3—6	0—3	beakless or pseudo rostrate	round and fluffy	nothing	6.43	round and fluffy	nothing	8.1
DX5	rod-shaped, ovoid or nearly elliptical	brown to black	3—6	0—3	beakless or pseudo rostrate	round and fluffy	nothing	8.73	round and fluffy	nothing	7.53
DX54	rod-shaped, ovoid or nearly elliptical	brown to black	3—6	0—3	beakless or pseudo rostrate	round and fluffy	nothing	6.3	round and fluffy	nothing	5.94
DY41	rod-shaped, ovoid or nearly elliptical	brown to black	3—6	0—3	beakless or pseudo rostrate	round and fluffy	nothing	8.73	round and fluffy	nothing	7.53
G54	rod-shaped, ovoid or nearly elliptical	brown to black	3—6	0—3	beakless or pseudo rostrate	round and fluffy	nothing	9	round and fluffy	nothing	8.2
W210	rod-shaped, ovoid or nearly elliptical	brown to black	3—6	0—3	beakless or pseudo rostrate	round and fluffy	nothing	6.9	round and fluffy	nothing	5.42
W243	rod-shaped, ovoid or nearly elliptical	brown to black	3—6	0—3	beakless or pseudo rostrate	round and fluffy	nothing	9	round and fluffy	nothing	7.4
W283	rod-shaped, ovoid or nearly elliptical	brown to black	3—6	0—3	beakless or pseudo rostrate	round and fluffy	nothing	7.2	round and fluffy	nothing	6.45
W659	rod-shaped, ovoid or nearly elliptical	brown to black	3—6	0—3	beakless or pseudo rostrate	round and fluffy	nothing	6	round and fluffy	nothing	5.4
W730	rod-shaped, ovoid or nearly elliptical	brown to black	3—6	0—3	beakless or pseudo rostrate	round and fluffy	nothing	8.2	round and fluffy	nothing	7.6
W762	rod-shaped, ovoid or nearly elliptical	brown to black	3—6	0—3	beakless or pseudo rostrate	round and fluffy	nothing	6.7	round and fluffy	nothing	6.1
Y187	rod-shaped, ovoid or nearly elliptical	brown to black	3—6	0—3	beakless or pseudo rostrate	round and fluffy	nothing	7.63	round and fluffy	nothing	8.8
Y61	rod-shaped, ovoid or nearly elliptical	brown to black	3—6	0—3	beakless or pseudo rostrate	round and fluffy	nothing	9	round and fluffy	nothing	7.6
A584	rod-shaped, ovoid or nearly elliptical	brown to black	3—6	0—3	beakless or pseudo rostrate	round and fluffy	nothing	7.2	round and fluffy	nothing	6.54	Alternaria gossypina(group2)
DX83	rod-shaped, ovoid or nearly elliptical	brown to black	3—6	0—3	beakless or pseudo rostrate	round and fluffy	nothing	7.43	round and fluffy	nothing	6.81
DX93	rod-shaped, ovoid or nearly elliptical	brown to black	3—6	0—3	beakless or pseudo rostrate	round and fluffy	nothing	7.4	round and fluffy	nothing	8.7
G456	rod-shaped, ovoid or nearly elliptical	brown to black	3—6	0—3	beakless or pseudo rostrate	round and fluffy	nothing	8	round and fluffy	nothing	7.8
G554	rod-shaped, ovoid or nearly elliptical	brown to black	3—6	0—3	beakless or pseudo rostrate	round and fluffy	nothing	7.28	round and fluffy	nothing	7.1
W22	rod-shaped, ovoid or nearly elliptical	brown to black	3—6	0—3	beakless or pseudo rostrate	round and fluffy	nothing	6.89	round and fluffy	nothing	6.2
W277	rod-shaped, ovoid or nearly elliptical	brown to black	3—6	0—3	beakless or pseudo rostrate	round and fluffy	nothing	6.56	round and fluffy	nothing	5.78
W349	rod-shaped, ovoid or nearly elliptical	brown to black	3—6	0—3	beakless or pseudo rostrate	round and fluffy	nothing	9	round and fluffy	nothing	8.67
X182	rod-shaped, ovoid or nearly elliptical	brown to black	3—6	0—3	beakless or pseudo rostrate	round and fluffy	nothing	7.5	round and fluffy	nothing	7.23
A494	rod-shaped, ovoid or nearly elliptical	brown to black	3—6	0—4	beakless or pseudo rostrate	round and fluffy	nothing	6.93	round and fluffy	nothing	6.5	Alternaria alternata(group3)
A604	rod-shaped, ovoid or nearly elliptical	brown to black	3—6	0—3	beakless or pseudo rostrate	round and fluffy	nothing	4.2	round and fluffy	nothing	9
A883	rod-shaped, ovoid or nearly elliptical	brown to black	3—6	0—3	beakless or pseudo rostrate	round and fluffy	nothing	7	round and fluffy	nothing	7.2
A94	rod-shaped, ovoid or nearly elliptical	brown to black	3—6	0—3	beakless or pseudo rostrate	round and fluffy	nothing	9	round and fluffy	nothing	7.96
DX250	rod-shaped, ovoid or nearly elliptical	brown to black	3—6	0—3	beakless or pseudo rostrate	round and fluffy	nothing	9	round and fluffy	nothing	9
DX256	rod-shaped, ovoid or nearly elliptical	brown to black	3—6	0—3	beakless or pseudo rostrate	round and fluffy	nothing	7.89	round and fluffy	nothing	8
DX290	rod-shaped, ovoid or nearly elliptical	brown to black	3—6	0—3	beakless or pseudo rostrate	round and fluffy	nothing	7.68	round and fluffy	nothing	8
DX302	rod-shaped, ovoid or nearly elliptical	brown to black	3—6	0—3	beakless or pseudo rostrate	round and fluffy	nothing	9	round and fluffy	nothing	9
DX307	rod-shaped, ovoid or nearly elliptical	brown to black	3—6	0—3	beakless or pseudo rostrate	round and fluffy	nothing	7.2	round and fluffy	nothing	7.92
DX309	rod-shaped, ovoid or nearly elliptical	brown to black	3—6	0—3	beakless or pseudo rostrate	round and fluffy	nothing	8.35	round and fluffy	nothing	6.7
DX310	rod-shaped, ovoid or nearly elliptical	brown to black	3—6	0—3	beakless or pseudo rostrate	round and fluffy	nothing	8.76	round and fluffy	nothing	6.87
DX311	rod-shaped, ovoid or nearly elliptical	brown to black	3—6	0—3	beakless or pseudo rostrate	round and fluffy	nothing	6.94	round and fluffy	nothing	6
DX71	rod-shaped, ovoid or nearly elliptical	brown to black	3—6	0—3	beakless or pseudo rostrate	round and fluffy	nothing	7.2	round and fluffy	nothing	6.73
DB94	rod-shaped, ovoid or nearly elliptical	brown to black	3—6	0—3	beakless or pseudo rostrate	round and fluffy	orange	8.65	round and fluffy	orange	8.25	Alternaria steviae(group4)

## Sheet: Pathogenicity data
Average spot size / mm2	Aa	Ht	Ah	Ul	Ab	Fm	Ap	Ct	Cg	Lc	Number of host
A100	0	34.2	0	0	5.8	65.9	0	0	0	0	3	group1
A699	18	13.2	5.9	0	0	34.9	0	0	0	0	4
DX101	34.8	27.8	7.4	7.4	0	12.1	7.9	0	0	0	6
DX23	0	32.2	9.8	6.7	23.1	33	7.9	0	0	0	6
DX291	55.8	34	11.1	5.3	12.3	46	12.4	0	0	0	7
DX296	52.6	9.9	0	0	46.5	98.9	22	7.2	0	4	7
DX297	20.8	14.4	16.2	18.6	42.8	24.8	1.2	9.6	7.2	0	9
DX300	37	45.3	11	0	12.3	9.9	0	0	0	0	5
DX313	13.6	2.3	0	0	19.8	45.3	9.3	0	0	0	5
DX42	51.8	0	6.8	2.6	5.8	26.4	0	8.6	4.6	3	8
DX5	0	6.6	0	0	0	5.8	0	0	0	0	2
DX54	37.4	7.8	0	0	0	4.3	0	0	0	1.8	4
DX79	89.6	34.9	12.2	9.9	12.1	46.3	19.1	7.8	1.2	0	9
DY41	16	65.3	0	18.9	22.1	45.3	11	0	0	0	6
G149	47.2	6.4	12	3	16.8	237.6	24.4	29.8	10.8	19.6	10
G54	0	25.2	10.6	0	20.4	9	5.6	10.4	0	0	6
G574	44.1	19.4	0	0	42.1	78.9	16.1	0	0	0	5
W210	30	56.4	7.7	15.2	22.1	54.3	12.1	9.7	5.6	4	10
W243	22.4	36.8	17.1	9.9	12.1	32.4	0	0	0	0	6
W283	0	6.5	0	0	0	0	0	0	0	0	1
W386	18.4	3.4	6.7	11.3	10.6	21.3	4.7	0	0	0	7
W419	0	6.7	0	0	0	0	0	0	0	0	1
W659	16.2	24.3	0	0	17.8	31.2	0	0	0	0	4
W730	38.8	19.8	10.8	0	20.6	28.2	19.8	0	0	62.4	7
W731	26	34.8	2.4	9.4	28.2	67.2	0	11.2	0	0	7
W762	70	59.6	17.8	9.8	20.7	47.6	12.3	7.8	0	4	9
Y187	81	56.4	0	12.7	86.6	37	6.6	2.4	0	0	7
Y60	45.6	15.4	0	20.8	83.6	83.6	5.6	13.8	15.4	3.6	9
Y61	32	14	24.8	18.8	32	135	25.4	24	20.4	25.8	10
A584	45.8	76.4	12	0	9.5	23.4	12.4	9.3	2.3	0	8	group2
DX295	32.6	36	11.3	13.1	56.9	29.3	2.3	8.2	2.3	4	10
DX83	20	19.6	0	0	0	7.7	0	0	0	0	3
DX93	0	15.1	0	0	0	3.4	0	0	0	0	2
G554	27	42.1	0	0	19.5	24	19.1	0	4.5	0	6
W22	0	16	0	0	0	18.9	0	0	0	0	2
W277	0	4.4	0	0	0	0	0	0	0	0	1
W349	0	12.6	0	0	11.4	65.8	0	0	0	0	3
X182	0	12.4	0	0	0	6.5	0	0	0	0	2
A23	12.2	8.7	0	0	0	0	0	0	0	0	2	group3
A494	57	56	38	2.4	16.8	27	24.4	0	2.4	0	8
A94	44.8	12.3	23.1	12.4	29.3	97.5	2.4	12.4	2.2	0	9
DX19	0	20.4	0	0	17.2	11.3	0	0	0	0	3
DX250	51	9.9	12.1	0	23.1	78.2	19	0	3.2	0	7
DX256	61.8	45.7	0	0	17.6	55.2	0	0	0	4	5
DX302	45	67.3	12.6	2.3	12.3	98.3	12.2	0	2.3	0	8
DX307	30.4	12	0	0	9.8	32.1	0	0	0	0	4
DX308	55.4	5.6	0	0	21.5	77.9	15.2	6.7	0	4	7
DX311	89.4	6.4	11.5	6.5	12.9	87.1	7.7	0	0	0	7
DX71	23.2	12.1	12.1	2.9	34.8	2.3	0	1.5	0	0	7
G1780	9.2	51	5	4.4	62.2	332.4	56.6	7.8	5	31.6	10
G717	25.4	26.2	22.6	4.4	25.2	25.4	0	10.4	0	0	7
DB94	40.6	19.6	0	0	8.4	97	21.6	14.4	0	1.2	7	group4
											308
